# Supplementary material for: Selective electrocatalytic CO2 reduction to acetate on polymeric Cu–L (L = pyridinic N and carbonyl group) complex core–shell microspheres
Source: Royal Society of Chemistry journal article supplement (doi:10.1039/d1gc01464a), 2021-01-01
Supplement: d1gc01464a1.pdf [file d1gc01464a1.pdf]

## Electronic supporting information

### Selectively electrocatalytic CO<sub>2</sub> reduction to acetate on polymeric Cu-L (L=pyridinic N and carbonyl group) complex core-shell microspheres

Fei Guo,<sup>a</sup> Bing Liu,<sup>a</sup> Mengping Liu,<sup>a</sup> Yu Xia,<sup>a</sup> Tianlong Wang,<sup>a</sup> Wei Hu,<sup>a</sup> Lihong Tian<sup>a\*</sup>,  
Phoebe Fyffe,<sup>b</sup> Xiaobo Chen<sup>b\*</sup>

<sup>a</sup>Hubei Collaborative Innovation Center for Advanced Organochemical Materials,  
Ministry-of-Education Key Laboratory for the Synthesis and Applications of Organic  
Functional Molecules, Hubei University, Wuhan 430062, P. R. China

<sup>b</sup> Department of Chemistry, University of Missouri – Kansas City, Kansas City,  
Missouri 64110, United States.

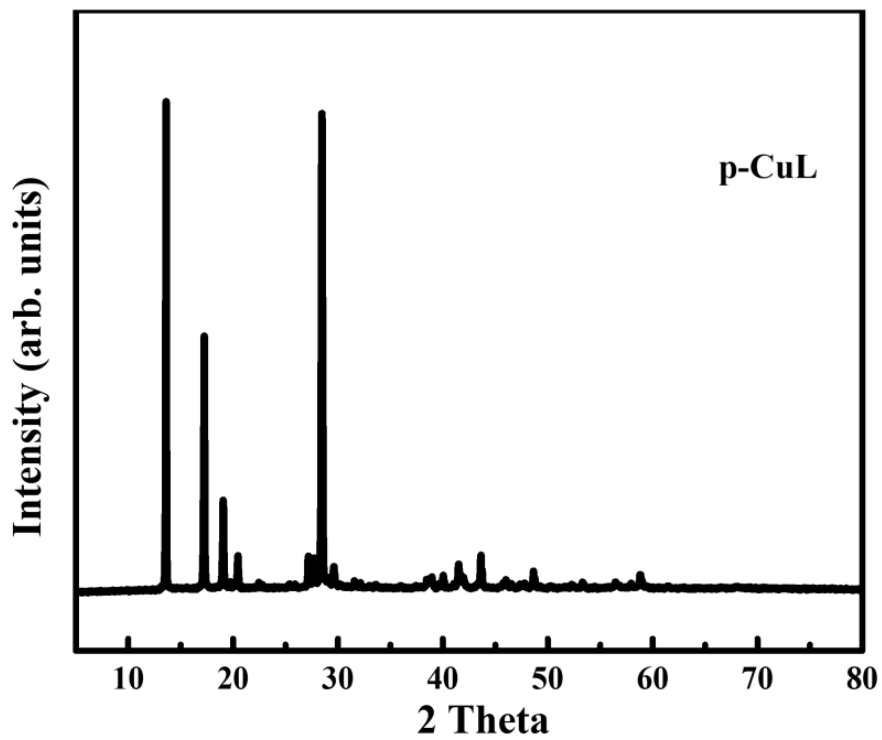

**Fig. S1.** The XRD pattern of p-CuL.

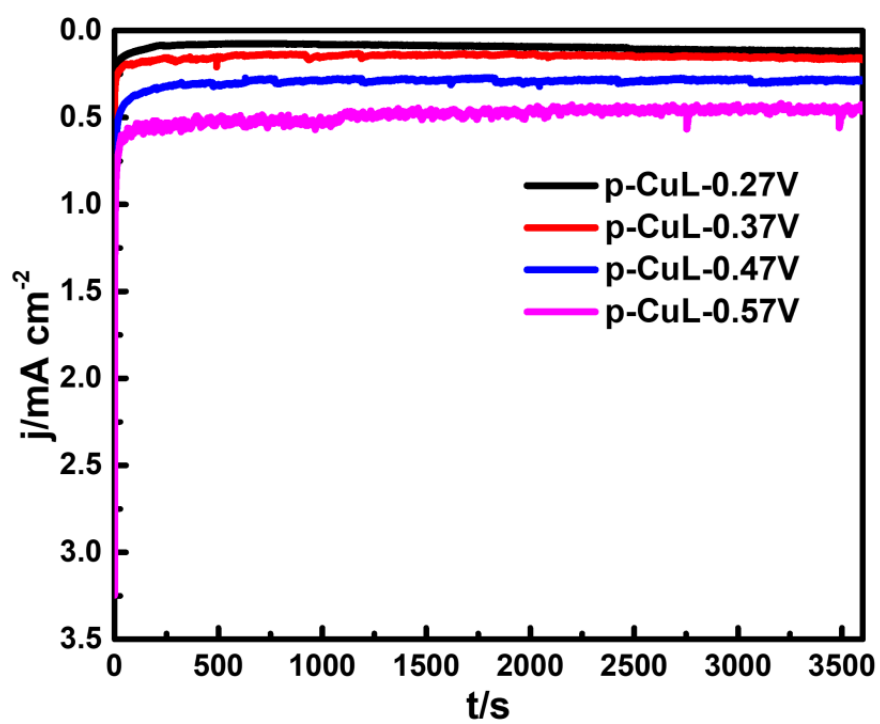

**Fig. S2.** Current variation in a 0.5M  $\text{KHCO}_3$   $\text{CO}_2$ -saturated aqueous solution at potentials from  $-0.27\text{V}$  to  $-0.57\text{V}$  vs. RHE.

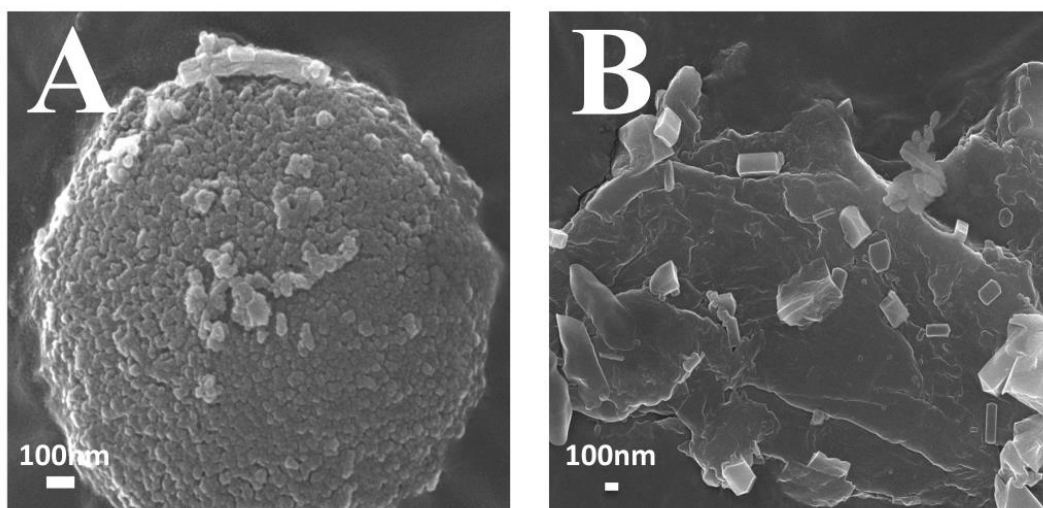

**Fig. S3.** FE-SEM graphs of p-CuL-6(A), p-CuL-8 (B).

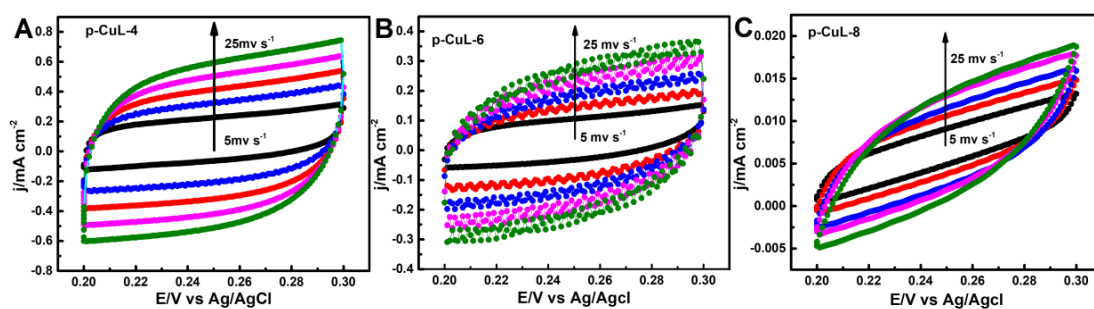

**Fig. S4.** Repeat the CV cycle at a scan rate of  $5\text{-}25\text{mV}\cdot\text{s}^{-1}$  within the potential range of  $0\text{-}0.3\text{V vs. Ag/AgCl}$  to measure the electrochemical double-layer capacitance (DLC) of p-CuL-4 (A), p-CuL-6 (B), p-CuL-8 (C).

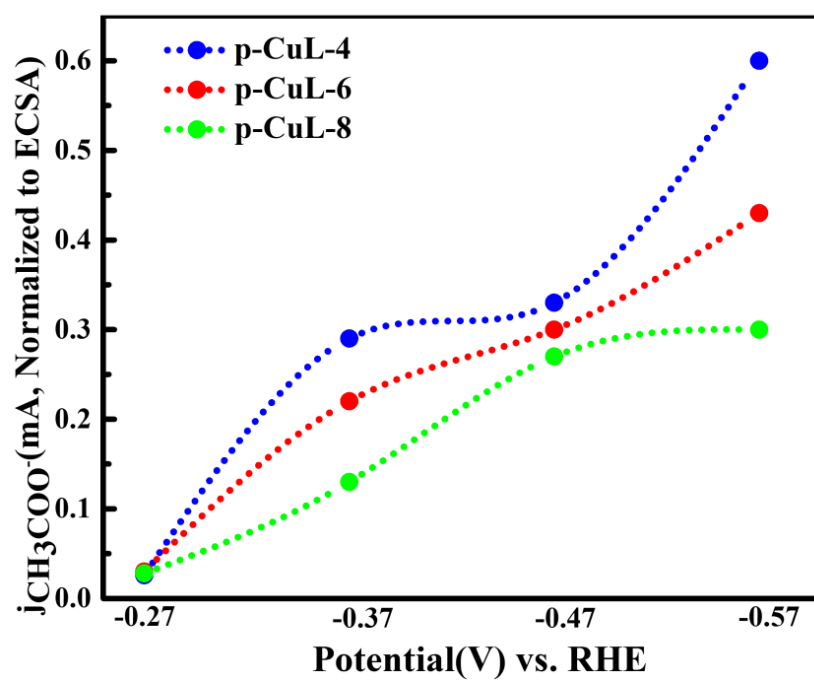

**Fig. S5.**  $j_{\text{acetate}}$  normalized to ECSA at same potentials among three catalysts.

**Table S1. Progress in Carbon Dioxide Reduction on Copper-based Catalyst.**

| <b>catalyst</b>                      | <b>Applied potential</b>                    | <b>Electrolyte</b>                                                                                                                                | <b>product</b>                                                                                                | <b>CH<sub>3</sub>COO<sup>-</sup> yield</b>                     | <b>Ref.</b>                     |
|--------------------------------------|---------------------------------------------|---------------------------------------------------------------------------------------------------------------------------------------------------|---------------------------------------------------------------------------------------------------------------|----------------------------------------------------------------|---------------------------------|
| Cu <sub>2</sub> (CuTCPP) nanosheets  | -1.55 V vs. RHE                             | CH <sub>3</sub> CN solution with 1 M H <sub>2</sub> O and 0.5 M ionic liquid 1-ethyl-3-methylimidazolium tetrafluoroborate (EMIMBF <sub>4</sub> ) | CH <sub>3</sub> COO <sup>-</sup><br>CO<br>CH <sub>4</sub><br>HCOOH                                            | FE=16.8%                                                       | Chem Sci, 2019,10: 2199–2205    |
| Cu <sub>10</sub> -CNT                | -1.4 V vs. RHE                              | 0.5 M KHCO <sub>3</sub>                                                                                                                           | CH <sub>3</sub> COO <sup>-</sup><br>HCOOH<br>CH <sub>3</sub> OH                                               | TOF=208.7 (μmolh <sup>-1</sup> g <sub>Cu</sub> <sup>-1</sup> ) | Green Chem, 2017,19: 2406-2415  |
| Fe-Cu Mixed Oxide                    | -0.4 V vs. Ag/AgCl (Photo-electrocatalysis) | 0.1 M NaHCO <sub>3</sub>                                                                                                                          | CH <sub>3</sub> COO <sup>-</sup>                                                                              | FE=80%                                                         | ACS Catal. 2017,7(1): 177–180   |
| (Cu) <sub>n</sub> ,(Ag) <sub>m</sub> | -1.33 V vs. RHE                             | 0.5 M KHCO <sub>3</sub>                                                                                                                           | CH <sub>3</sub> COO <sup>-</sup><br>CO<br>CH <sub>4</sub><br>HCOOH                                            | FE=21.2%                                                       | PNAS 2018, 115(2): 278-283      |
| Cu-CeO <sub>2</sub>                  | -1.8 V vs. RHE                              | 0.1 M KHCO <sub>3</sub>                                                                                                                           | CH <sub>4</sub><br>C <sub>2</sub> H <sub>4</sub><br>CH <sub>3</sub> COOH<br>HCOOH<br>CO<br>CH <sub>3</sub> OH | FE=5%                                                          | ACS Catal. 2018,8(8): 7113–7119 |

**Table S2. The content of each element in the catalyst.**

| <b>catalyst</b> | <b>ICP-AES</b> | <b>Elemental analysis (wt%)</b> |          |          |          |
|-----------------|----------------|---------------------------------|----------|----------|----------|
|                 | <b>Cu</b>      | <b>N</b>                        | <b>C</b> | <b>H</b> | <b>O</b> |
| <b>p-CuL-4</b>  | 21.0wt%        | 28.6                            | 20.3     | 2.9      | 21.0     |
| <b>p-CuL-6</b>  | 21.0wt%        | 28.6                            | 20.1     | 2.9      | 22.1     |
| <b>p-CuL-8</b>  | 20.0wt%        | 28.9                            | 20.3     | 2.9      | 22.0     |
